# Supplementary material
Source: PubMed Central journal article supplement (PMC4846469)

Supplemental figure 1 Spatial maps and ROIs of basal ganglia network (BGN) and central executive network (CEN). Note. The color maps represent the results of one-sample t-test ( $p < 0.05$ , Familywise Error Rate corrected). MNI = Montreal Neurological Institute.

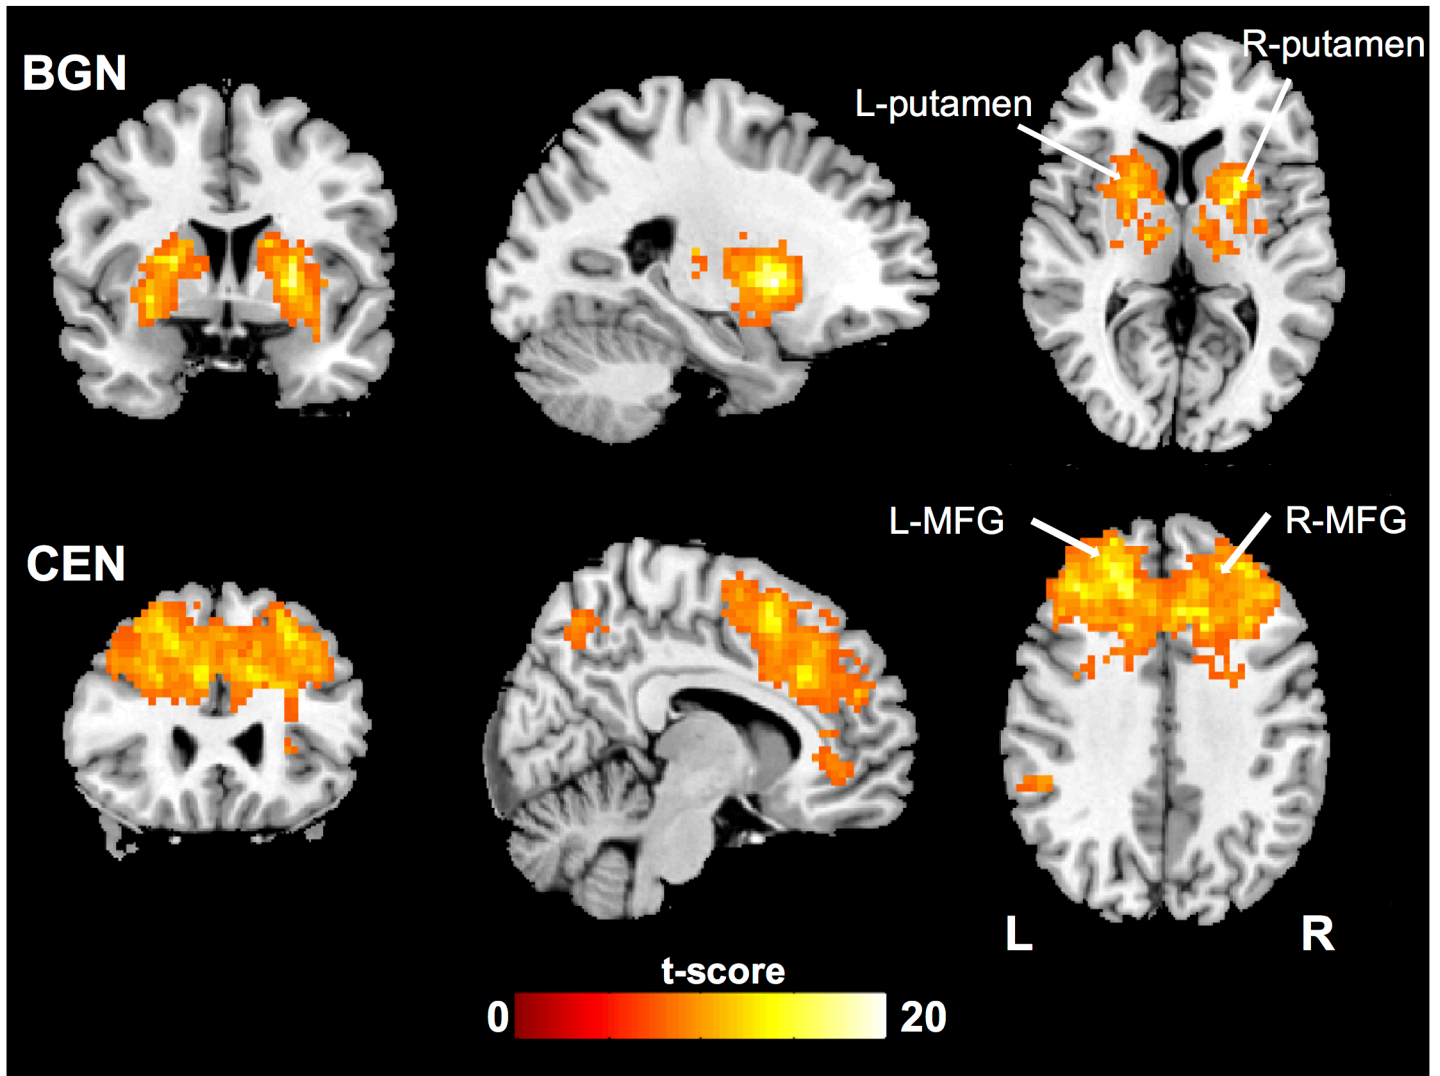

| Regions                      | Peak<br>t-value | Clusters<br>size<br>(voxels) | MNI coordinates |     |    |
|------------------------------|-----------------|------------------------------|-----------------|-----|----|
|                              |                 |                              | X               | Y   | Z  |
| <b>BGN</b>                   |                 |                              |                 |     |    |
| Left Putamen                 | 20.8            | 1097                         | -24             | 6   | 0  |
| Right Putamen                | 16.38           |                              | 30              | 6   | -6 |
| Left Thalamus                | 15.69           |                              | -15             | -21 | 9  |
| <b>CEN</b>                   |                 |                              |                 |     |    |
| Left MFG                     | 18.98           | 5579                         | -33             | 51  | 18 |
| Right MFG                    | 17.84           |                              | 15              | 42  | 39 |
| Left Superior Parietal Lobe  | 17.23           | 233                          | -6              | -63 | 45 |
| Right Inferior Parietal Lobe | 10.35           | 66                           | 51              | -42 | 33 |

Supplemental figure 2. Inter-network functional connectivity of left putamen in BGN (A) and HF-HRV responses in individual MCI cases with lowest (=0, ID\_L) and highest MF (=42, ID\_H) from the MRI subsample (B).

**A** Left BGN seed (-24, 6, 0, 12mm)

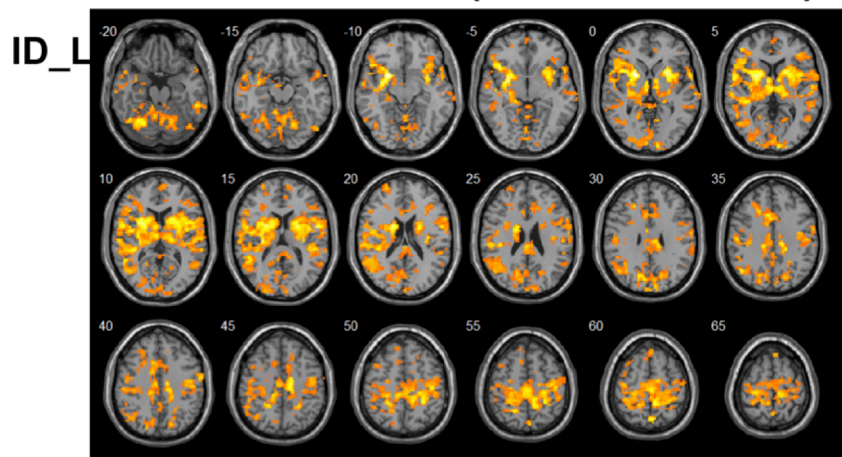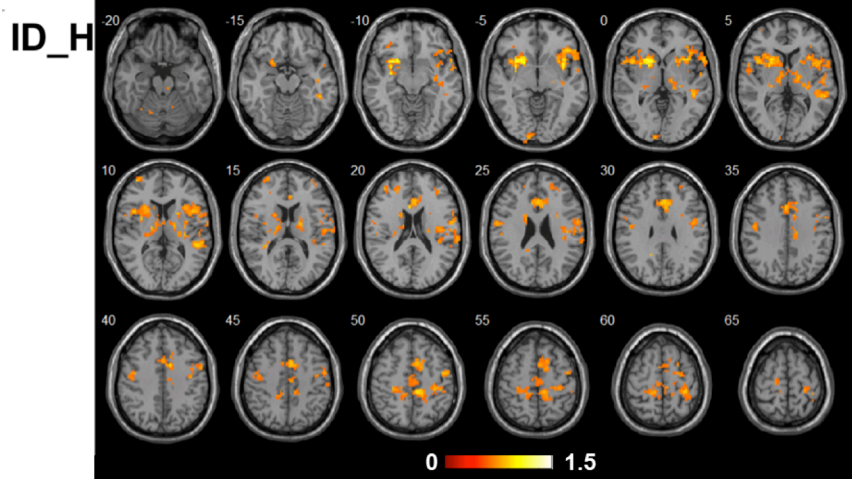

**B**

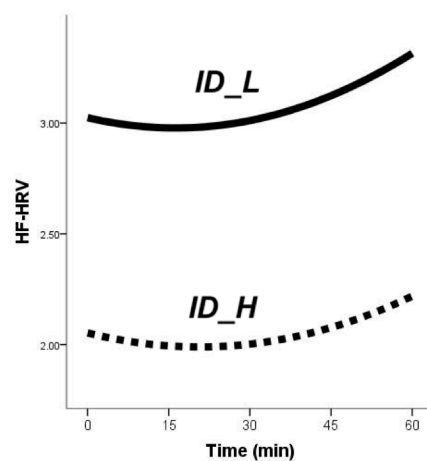

Supplement: NIHMS751423-supplement.pdf [file NIHMS751423-supplement.pdf]
